# Supplementary material for: Occurrence and Molecular Characteristics of Microsporidia in Captive Red Pandas (Ailurus fulgens) in China
Source: MDPI journal article supplement (doi:10.3390/ani13111864), 2023-06-03
Supplement: s1 [file s1]

**Supplementary Table S1.** all primers, annealing temperatures and amplicon sizes of PCR amplification.

| Gene                                        | Primer sequences (5'-3')                            | AT(°C) | Size(bp) | Reference |
|---------------------------------------------|-----------------------------------------------------|--------|----------|-----------|
| <i>E. bienewisi</i><br>ITS1                 | F1: GATGGTCATAGGGATGAAGAGCTT                        | 55     | -392     | [22]      |
|                                             | R1: AATACAGGATCACTTGGATCCGT                         |        |          |           |
|                                             | F2: AGGGATGAAGAGCTTCGGCTCTG                         |        |          |           |
|                                             | R2: AATATCCCTAATACAGGATCACT                         |        |          |           |
| <i>Encephalitozoon</i><br><i>n</i> spp. ITS | F1: TGAATG(G/T)GTCCCTGT                             | 55     | -300     | [24]      |
|                                             | R1: TCACTCGCCGCTACT                                 |        |          |           |
|                                             | F2:<br>GGAATTACACCGCCCGTC(A/G)(C/T)TAT              |        |          |           |
|                                             | R2:<br>CCAAGCTTATGCTTAAGT(C/T)(A/C)AA(A/<br>G)G GGT |        |          |           |
| MS1                                         | F1: AAGTTGCAAGTTCAGTGTTTGAA                         | 58     | -676     | [23]      |
|                                             | R1: GATGAATATGCATCCATTGATGTT                        |        |          |           |
|                                             | F2: TTGTAAATCGACCAAATGTGCTAT                        |        |          |           |
|                                             | R2: ACATAAACCCTAATTAATGTAAC                         |        |          |           |
| MS3                                         | F1: CAAGCACTGTGGTTACTGTT                            | 55     | -537     |           |
|                                             | R1:AAGTTA GGGCATTTAATAAAATTA                        |        |          |           |
|                                             | F2: GTTCAAGTAATTGATACCAGTCT                         |        |          |           |
|                                             | R2: CTCATTGAATCTAAATGTGTATAA                        |        |          |           |
| MS4                                         | F1: GCATATCGTCTCATAGGAACA                           | 55     | -885     |           |
|                                             | R1: GTTCATGGTTATTAATTCCAGAA                         |        |          |           |
|                                             | F2: CGA AGTGTACTACATGTCTCT                          |        |          |           |
|                                             | R2: GGACTTTAATAAGTTACCTATAGT                        |        |          |           |
| MS7                                         | F1: GTTGATCGTCCAGATGGAATT                           | 55     | -471     |           |
|                                             | R1: GACTATCAGTATTACTGATTATAT                        |        |          |           |
|                                             | F2: CAATAGTAAAGGAAGATGGTCA                          |        |          |           |
|                                             | R2: CGTCGCTTTGTTTCATAATCTT                          |        |          |           |

**Supplementary Figure S1.** Sequence variation in the ITS region between the new SCR1 genotype and the known FJL genotype of *Enterocytozoon bienewisi*.

|                         |                                                                                                                                                                 |
|-------------------------|-----------------------------------------------------------------------------------------------------------------------------------------------------------------|
| MK357781 Sika deer FJL  | G C T C T G A A T A T C T A T G G C T A G A T A A A G T A C A A G T C G T A A C A A G G T T T C A G T T G G A G A A C C A G C T G A A G G A T C A T T T T C A G |
| MW880238 Red panda SCR1 | .....                                                                                                                                                           |
| MK357781 Sika deer FJL  | T T T T T G G G G T G T G G G T A T C G G A A T G T G T G G T A G G T G A T G T G T G T G T A T G G G G G A T G C C G A G G G G A C C A G C T G T G C G G       |
| MW880238 Red panda SCR1 | .....G.....                                                                                                                                                     |
| MK357781 Sika deer FJL  | T G G T G T G T G T A G G C G T G A G A G T G T A T C T G T A A G G G T G A G G G A T G T G G G T G C A A C G A G T T A G A G G T G G T T T C A T G T G G A A T |
| MW880238 Red panda SCR1 | .....                                                                                                                                                           |
| MK357781 Sika deer FJL  | A G T G G G A T T G G T A C G T G A T G G T T G G A T G G G G G A A T G A T G T G T G T A T G G G T G A G G A A A T C G G A G G T T G C G G T G C G A G C G G   |
| MW880238 Red panda SCR1 | A.....                                                                                                                                                          |
| MK357781 Sika deer FJL  | C A G T A G G G T G C C A T C A A G A G G T G T A T                                                                                                             |
| MW880238 Red panda SCR1 | .....                                                                                                                                                           |
